# Supplementary material for: The Landscape of Phenotypic and Transcriptional Responses to Ciprofloxacin in Acinetobacter baumannii: Acquired Resistance Alleles Modulate Drug-Induced SOS Response and Prophage Replication
Source: PubMed Central journal article supplement (PMC6561030; doi:10.1128/mbio.01127-19), 2019-06-11

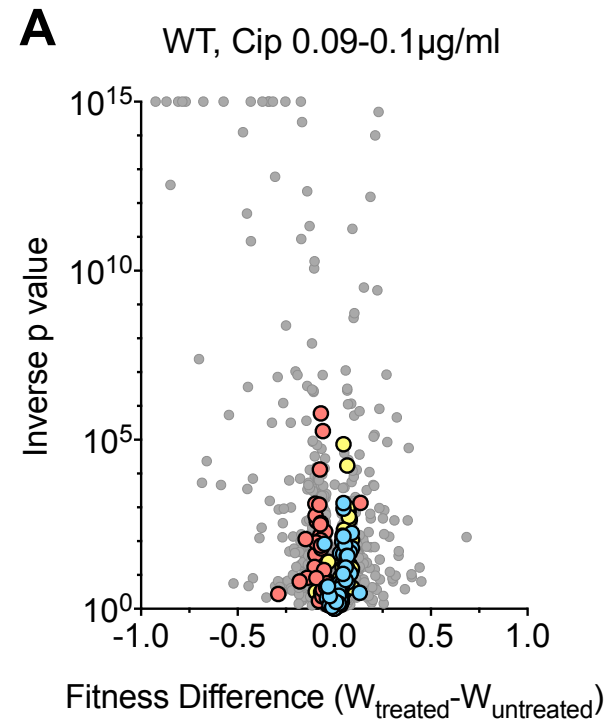

Prophage  
regions  
P1 P2 P3

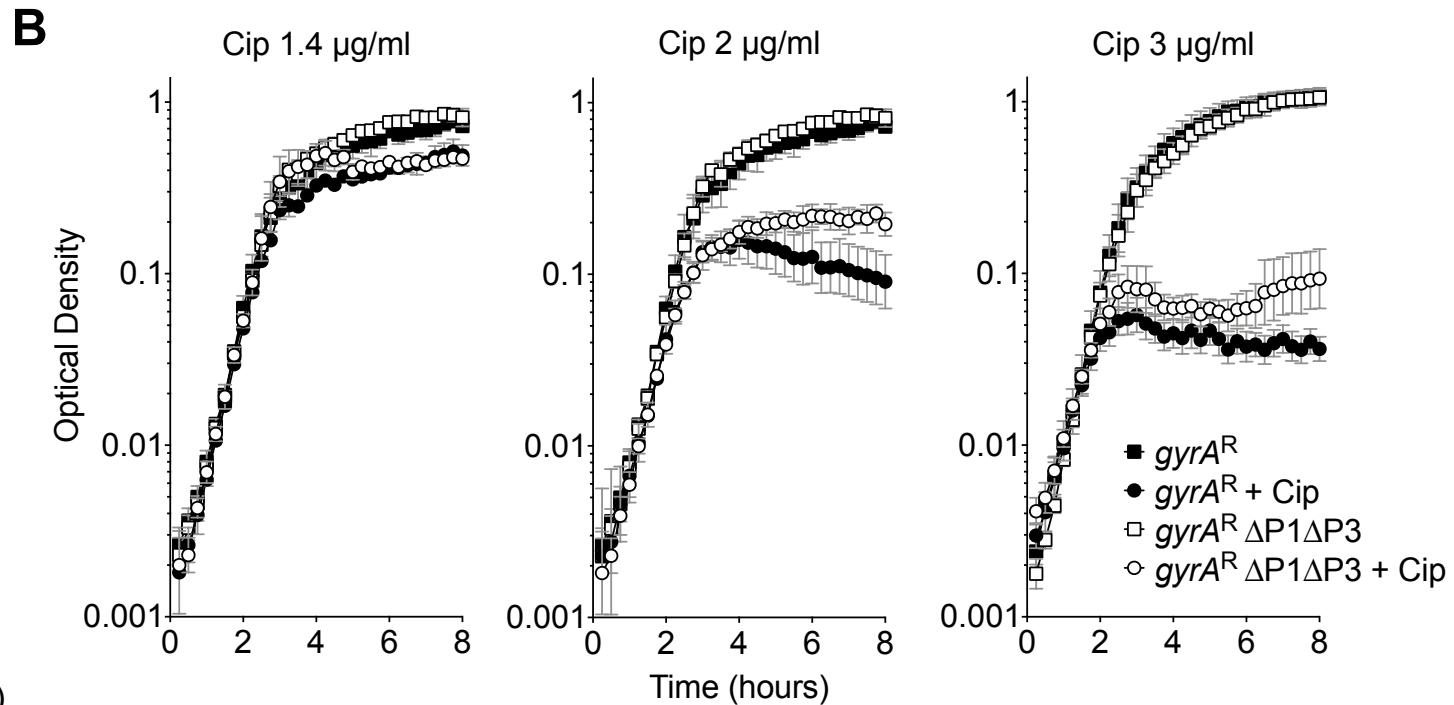

Supplement: mBio.01127-19-sf002.pdf [file mBio.01127-19-sf002.pdf]
