# Supplementary material for: The Landscape of Phenotypic and Transcriptional Responses to Ciprofloxacin in Acinetobacter baumannii: Acquired Resistance Alleles Modulate Drug-Induced SOS Response and Prophage Replication
Source: PubMed Central journal article supplement (PMC6561030; doi:10.1128/mbio.01127-19), 2019-06-11

■ WT  
■ *gyrA*(S81L)

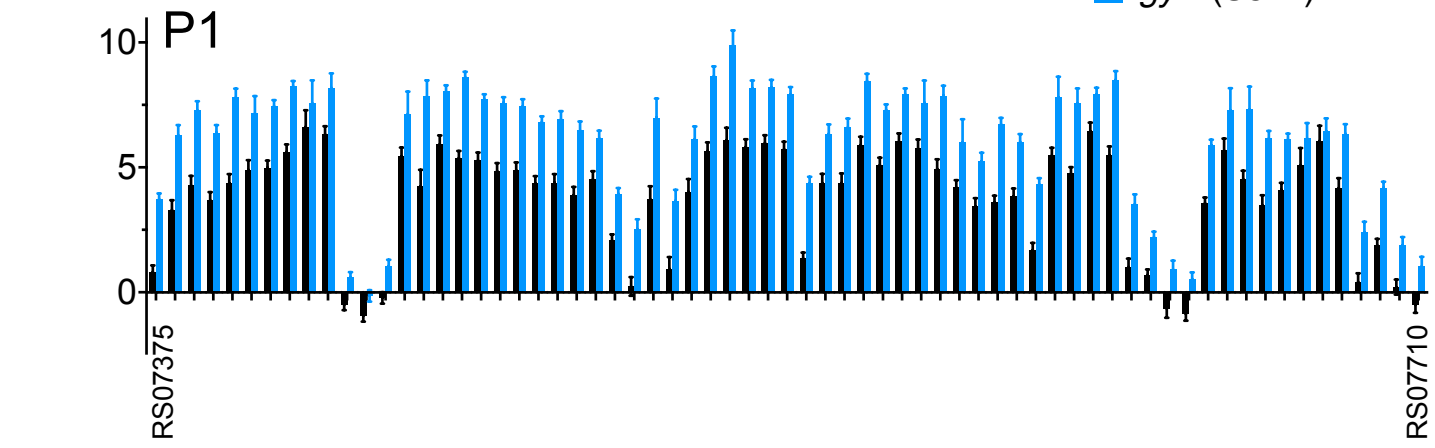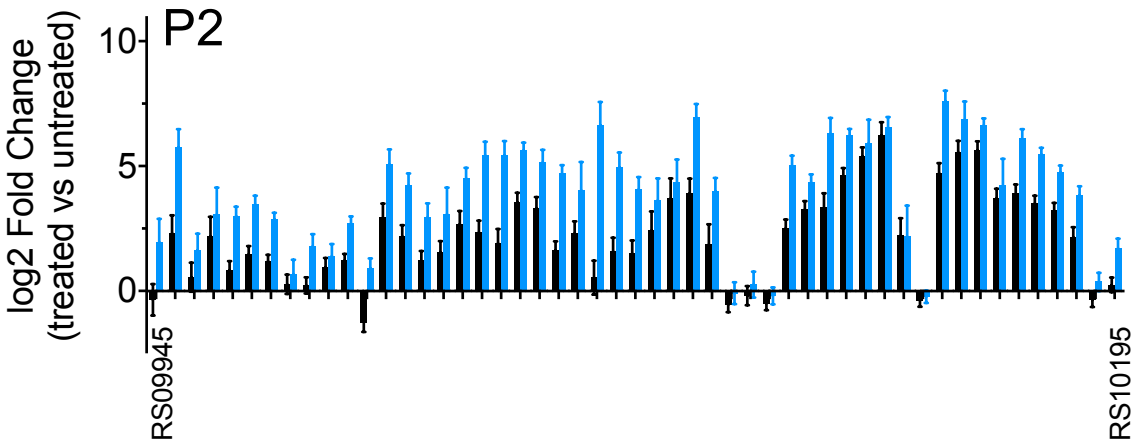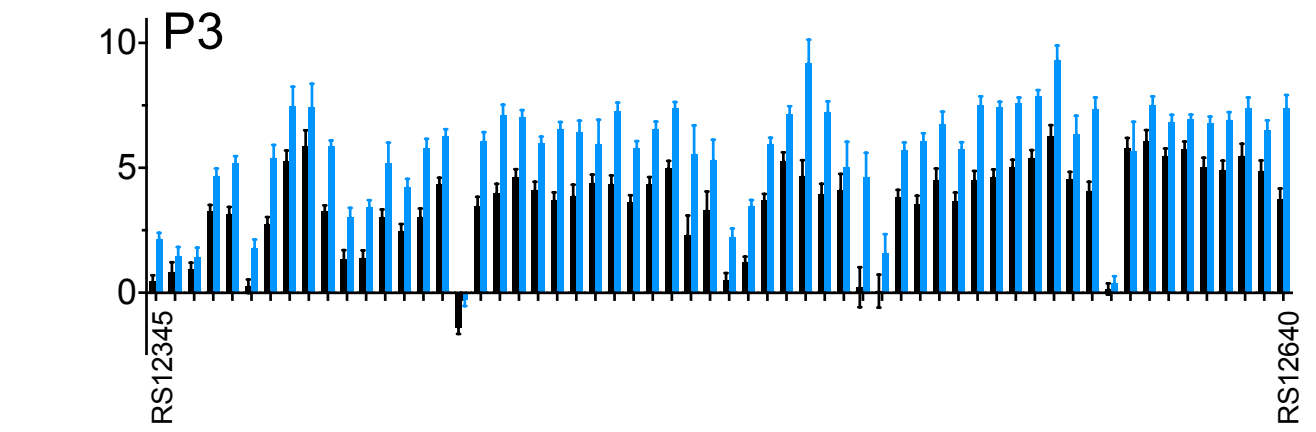

Supplement: mBio.01127-19-sf003.pdf [file mBio.01127-19-sf003.pdf]
