# Supplementary material for: The Landscape of Phenotypic and Transcriptional Responses to Ciprofloxacin in Acinetobacter baumannii: Acquired Resistance Alleles Modulate Drug-Induced SOS Response and Prophage Replication
Source: PubMed Central journal article supplement (PMC6561030; doi:10.1128/mbio.01127-19), 2019-06-11
Supplement: mBio.01127-19-sf004.pdf [file mBio.01127-19-sf004.pdf]

WT

*gyrA<sup>R</sup>**gyrA<sup>R</sup>parC<sup>R</sup>*

untreated

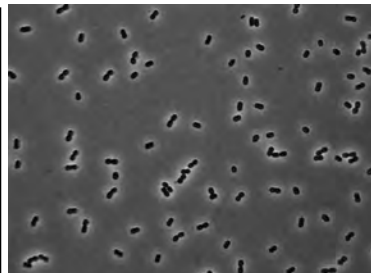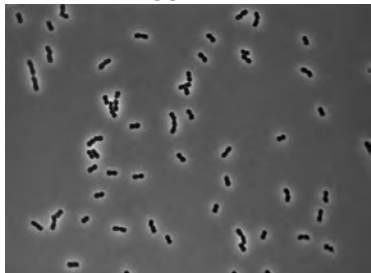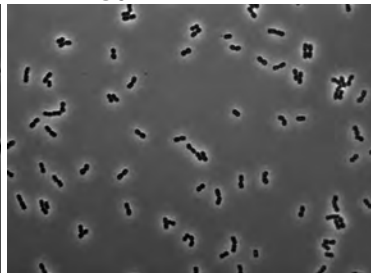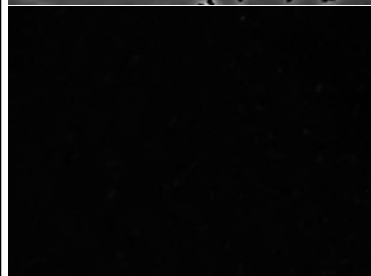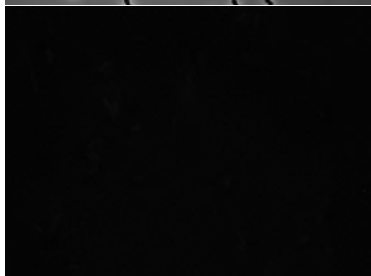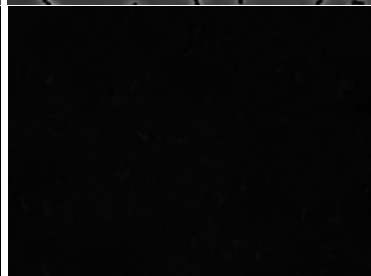

+ ciprofloxacin

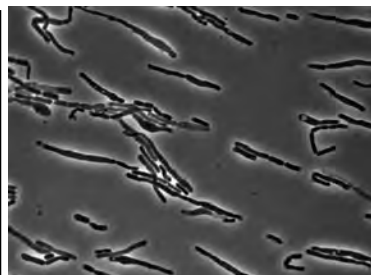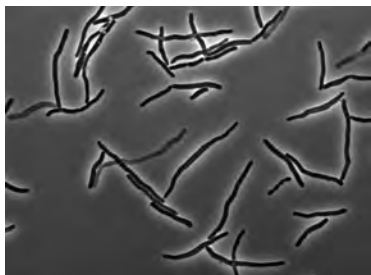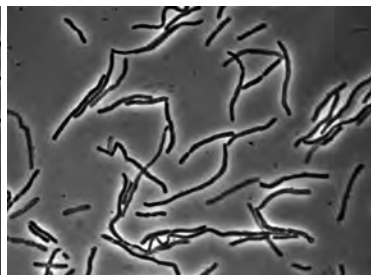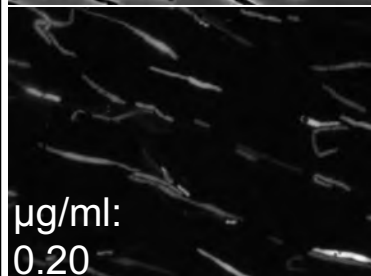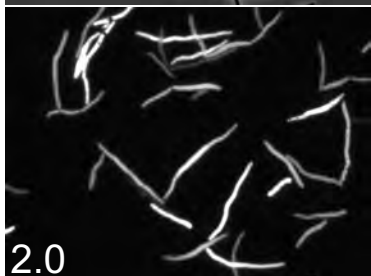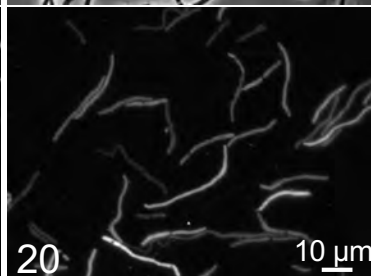μg/ml:  
0.20

2.0

20

10 μm
