# Supplementary material for: The Landscape of Phenotypic and Transcriptional Responses to Ciprofloxacin in Acinetobacter baumannii: Acquired Resistance Alleles Modulate Drug-Induced SOS Response and Prophage Replication
Source: PubMed Central journal article supplement (PMC6561030; doi:10.1128/mbio.01127-19), 2019-06-11
Supplement: mBio.01127-19-st001.pdf [file mBio.01127-19-st001.pdf]

**S1 Table. Strains and plasmids.**

| Strain or plasmid          | Genotype or description                                                                                                  | Reference  |
|----------------------------|--------------------------------------------------------------------------------------------------------------------------|------------|
| <b><i>A. baumannii</i></b> |                                                                                                                          |            |
| ATCC 17978                 | cerebrospinal fluid isolate                                                                                              | (1)        |
| EGA336                     | ATCC 17978 <i>gyrA</i> (S81L)                                                                                            | This study |
| GVA41                      | ATCC 17978 <i>parC</i> (S84L)                                                                                            | This study |
| GVA37                      | ATCC 17978 <i>gyrA</i> (S81L) <i>parC</i> (S84L)                                                                         | This study |
| EGA465                     | ATCC 17978 $\Delta$ <i>adeIJK</i>                                                                                        | (2)        |
| GVA68                      | ATCC 17978 $\Delta$ <i>recN</i>                                                                                          | This study |
| GVA84                      | ATCC 17978 $\Delta$ <i>ctpA</i>                                                                                          | This study |
| EGA627                     | ATCC 17978 <i>pbp1a</i> (N178TfsX27)                                                                                     | This study |
| GVA61                      | ATCC 17978 $\Delta$ <i>gidA</i>                                                                                          | This study |
| YDA124                     | ATCC 17978 $\Delta$ P1 $\Delta$ P3                                                                                       | This study |
| <b><i>E. coli</i></b>      |                                                                                                                          |            |
| DH5 $\alpha$               | <i>supE44</i> $\Delta$ <i>lacU169</i> ( $\phi$ 80 <i>lacZ</i> $\Delta$ M15) <i>hsdR17 recA1 endA1 gyrA96 thi-1 relA1</i> | (3)        |
| DH5 $\lambda$ pir          | DH5 $\alpha$ ( $\lambda$ pir) <i>tet::Mu recA</i>                                                                        | (4)        |
| TO60                       | DH5 $\alpha$ $\lambda$ pir [F' <i>proAB lacI<sup>q</sup>Z</i> $\Delta$ M15 Tn10 (Tc <sup>R</sup> )]                      | (5)        |
| <b>plasmids</b>            |                                                                                                                          |            |
| pUC18                      | <i>oriColE1</i> MCS Cb <sup>R</sup>                                                                                      | (6)        |
| pSR47s                     | <i>oriTRP4 oriR6K</i> Km <sup>R</sup>                                                                                    | (7)        |
| pDL1073                    | Tn10 (Km <sup>R</sup> ) delivery plasmid, <i>ori pSC101</i> Cb <sup>R</sup>                                              | This study |
| pWH1266                    | shuttle plasmid, Cb <sup>R</sup> Tet <sup>R</sup>                                                                        | (8)        |
| pEGE244                    | pWH1266 with <i>rrnB</i> & T7 tandem terminators replacing EcoRI-PstI fragment, Tet <sup>R</sup>                         | (2)        |
| pGVE41                     | pWH1266 with <i>ctpA</i> replacing EcoRI-PstI fragment, Tet <sup>R</sup>                                                 | This study |
| pCC1                       | <i>recA</i> promoter-UTR(C::G)-mKate2 transcriptional fusion in pNLAC1 vector, Tet <sup>R</sup>                          | (9)        |
| pCC7                       | <i>trpB</i> promoter-UTR(C::G)-mKate2 transcriptional fusion in pNLAC1 vector, Tet <sup>R</sup>                          | (9)        |

## References

1. Bouvet P, Grimont P. 1986. Taxonomy of the Genus *Acinetobacter* with the Recognition of *Acinetobacter baumannii* sp. nov. *Acinetobacter haemolyticus* sp. nov. *Acinetobacter johnsonii* sp. nov. and *Acinetobacter junii* sp. nov. and Emended Descriptions of *Acinetobacter calcoaceticus* and *Acinetobacter lwoffii*. International Journal of Systematic Bacteriology 36:228-240.
2. Geisinger E, Mortman NJ, Vargas-Cuebas G, Tai AK, Isberg RR. 2018. A global regulatory system links virulence and antibiotic resistance to envelope homeostasis in *Acinetobacter baumannii*. PLoS Pathog 14:e1007030.
3. Hanahan D, Jessee J, Bloom FR. 1991. Plasmid transformation of *Escherichia coli* and other bacteria. Methods Enzymol 204:63-113.
4. Kolter R, Inuzuka M, Helinski DR. 1978. Trans-complementation-dependent replication of a low molecular weight origin fragment from plasmid R6K. Cell 15:1199-208.

5. O'Connor TJ, Adepoju Y, Boyd D, Isberg RR. 2011. Minimization of the *Legionella pneumophila* genome reveals chromosomal regions involved in host range expansion. Proc Natl Acad Sci U S A 108:14733-40.
6. Yanisch-Perron C, Vieira J, Messing J. 1985. Improved M13 phage cloning vectors and host strains: nucleotide sequences of the M13mp18 and pUC19 vectors. Gene 33:103-19.
7. Andrews HL, Vogel JP, Isberg RR. 1998. Identification of linked *Legionella pneumophila* genes essential for intracellular growth and evasion of the endocytic pathway. Infect Immun 66:950-8.
8. Hunger M, Schmucker R, Kishan V, Hillen W. 1990. Analysis and nucleotide sequence of an origin of DNA replication in *Acinetobacter calcoaceticus* and its use for *Escherichia coli* shuttle plasmids. Gene 87:45-51.
9. Ching C, Gozzi K, Heinemann B, Chai Y, Godoy VG. 2017. RNA-Mediated cis Regulation in *Acinetobacter baumannii* Modulates Stress-Induced Phenotypic Variation. J Bacteriol 199.
