# Supplementary material for: The Landscape of Phenotypic and Transcriptional Responses to Ciprofloxacin in Acinetobacter baumannii: Acquired Resistance Alleles Modulate Drug-Induced SOS Response and Prophage Replication
Source: PubMed Central journal article supplement (PMC6561030; doi:10.1128/mbio.01127-19), 2019-06-11
Supplement: mBio.01127-19-st002.pdf [file mBio.01127-19-st002.pdf]

S2 Table. Oligonucleotide primers

| <b>Cloning</b>                                                      |                                                                                       |                   |
|---------------------------------------------------------------------|---------------------------------------------------------------------------------------|-------------------|
| <b>primer name</b>                                                  | <b>Sequence (5' – 3'; restriction site underlined, with partial sites in italics)</b> | <b>RE site(s)</b> |
| gyrA_Lbam                                                           | CTGTGGATCCAGTTGGCGAAGTAAAAGATGC                                                       | BamHI             |
| gyrA_Rsal                                                           | TTTGGTGCAGAGTTAATACCACTTGCTCTTCAGG                                                    | Sall              |
| gyrA-S81L-R                                                         | AGTCACCATGCGGGTGTATTTAC                                                               |                   |
| gyrA-S81L-F                                                         | TAGCTGTTTATGAAACCATTGTTTCG                                                            |                   |
| parC_F4 NotI                                                        | CCTGGCGGCCGCACGCTGGTCAGTGAATATGTGC                                                    | NotI              |
| parC_R5 Sall                                                        | TATTGTCGACGCCAGACGCTAGCTTTATCTCTG                                                     | Sall              |
| parC NcoI 3                                                         | GAGTACCATGGCTTCATAACATGCCAAGTCACCATGTGGGTGGTATTTA                                     | NcoI              |
| recN-up-F                                                           | GACCGCGGCCGCATCAAATTGGGTGAACTCATGC                                                    | NotI              |
| recN-up-R                                                           | TTAAGAGCTCGAGCATAAACGCATCCAACG                                                        | SacI              |
| recN-down-F                                                         | TTCTGAGCTCTAATAAAGAAAATGAGAGAAAAAGATTGG                                               | SacI              |
| recN-down-R                                                         | GCATGTCGACATCGTAAGCAGCTTTATGTTGTGG                                                    | Sall              |
| ctpA_up-F                                                           | ATATGAGCTCTTGCAGCATTAGTCACCTATCG                                                      | SacI              |
| ctpA_up-R                                                           | GCAAGCGGCCGCAATTTAACTGCAATGAAAGCAAAGC                                                 | NotI              |
| ctpA_down-F                                                         | TAAAGTCGACTTTAGTACCGAAATTAATGGAACCTGG                                                 | Sall              |
| ctpA_down-R                                                         | TCTAGAGCTCAAGTAAATTTTATACTTCCTGTTCTGTCTCC                                             | SacI              |
| gidA-up-R                                                           | CATCGAGCTCTTTAGGATAGTGCATGAGTACAAAAACACC                                              | SacI              |
| gidA-up-F                                                           | TCTTGCGGCCGCCAGCAAGTGCGAAATCACC                                                       | NotI              |
| gidA-down-R                                                         | AAGCGTCGACAAACCGAATCTGACAAACTTGC                                                      | Sall              |
| gidA-down-F                                                         | GAAAGAGCTCGCTTAATTATTTAAGCGTGTA AAAAAGC                                               | SacI              |
| ctpA-comp-F                                                         | AACTGAATTCAGATTCTGTGCCTGCTGAAATGC                                                     | EcoRI             |
| ctpA-comp-R                                                         | CTAACTGCAGAGGAATGACTTTCGGCTCTTACGC                                                    | PstI              |
| <b>Tn-seq sequencing library construction</b>                       |                                                                                       |                   |
| <b>primer name</b>                                                  | <b>Sequence (5' – 3')</b>                                                             | <b>index</b>      |
| <i>First PCR</i>                                                    |                                                                                       |                   |
| Nextera 2A-R                                                        | GTCTCGTGGGCTCGGAGATGTGTATAAGAGACAG                                                    |                   |
| ojj928                                                              | CTGTGTGGGCACTCGACATATGAC                                                              |                   |
| <i>Second PCR -- Leftward TN10 specific Nextera Indexed primers</i> |                                                                                       |                   |
| Olk147                                                              | AATGATACGGCGACCACCGAGATCTACACGCAGGCGGGCCGGGGCCAAAATCAT<br>TAGGGGATTCATCAG             | GCAGGCCGG         |
| Olk148                                                              | AATGATACGGCGACCACCGAGATCTACACAGGCAGAACCGGGGGCCAAAATCAT<br>TAGGGGATTCATCAG             | AGGCAGAA          |
| Olk149                                                              | AATGATACGGCGACCACCGAGATCTACACCAGAGAGGCCGGGGGGCCAAAATCAT<br>TAGGGGATTCATCAG            | CAGAGAGG          |
| Olk150                                                              | AATGATACGGCGACCACCGAGATCTACACCAGGCTGCCGGGGGGCCAAAATCAT<br>TAGGGGATTCATCAG             | CGAGGCTG          |
| Olk151                                                              | AATGATACGGCGACCACCGAGATCTACACAAGAGGCACCGGGGGCCAAAATCAT<br>TAGGGGATTCATCAG             | AAGAGGCA          |
| Olk152                                                              | AATGATACGGCGACCACCGAGATCTACACGAGGAGCCCCGGGGGGCCAAAATCAT<br>TAGGGGATTCATCAG            | GAGGAGCC          |
| Olk153                                                              | AATGATACGGCGACCACCGAGATCTACACAGCGCAGACCGGGGGCCAAAATCAT<br>TAGGGGATTCATCAG             | AGCGCAGA          |
| Olk110                                                              | AATGATACGGCGACCACCGAGATCTACACGTAAGGAGCCGGGGGGCCAAAATCAT<br>TAGGGGATTCATCAG            | GTAAGGAG          |
| Olk154                                                              | AATGATACGGCGACCACCGAGATCTACACAACCCGGACCGGGGGCCAAAATCAT<br>TAGGGGATTCATCAG             | AACCCGGA          |
| Olk155                                                              | AATGATACGGCGACCACCGAGATCTACACGCGAAGCCCCGGGGGGCCAAAATCAT<br>TAGGGGATTCATCAG            | GCGGAAGC          |
| <i>Second PCR -- Rightward Nextera Indexed primers</i>              |                                                                                       |                   |
| olk141                                                              | CAAGCAGAAGACGGCATAACGAGATCCGCCTGCGTCTCGTGGGCTCGGAGATGTG                               | GCAGGCCGG         |

|                       |                                                         |          |
|-----------------------|---------------------------------------------------------|----------|
| N703 index            | CAAGCAGAAGACGGCATAACGAGATTTCTGCCTGTCTCGTGGGCTCGGAGATGTG | AGGCAGAA |
| N708 index            | CAAGCAGAAGACGGCATAACGAGATCCTCTCTGGTCTCGTGGGCTCGGAGATGTG | CAGAGAGG |
| N710 index            | CAAGCAGAAGACGGCATAACGAGATCAGCCTCGGTCTCGTGGGCTCGGAGATGTG | CGAGGCTG |
| N711 index            | CAAGCAGAAGACGGCATAACGAGATTGCCTCTTGTCTCGTGGGCTCGGAGATGTG | AAGAGGCA |
| olk142                | CAAGCAGAAGACGGCATAACGAGATGGCTCCTCGTCTCGTGGGCTCGGAGATGTG | GAGGAGCC |
| olk143                | CAAGCAGAAGACGGCATAACGAGATTCTGCGCTGTCTCGTGGGCTCGGAGATGTG | AGCGCAGA |
| olk144                | CAAGCAGAAGACGGCATAACGAGATCTCCTTACGTCTCGTGGGCTCGGAGATGTG | GTAAGGAG |
| olk145                | CAAGCAGAAGACGGCATAACGAGATTCCGGGTTGTCTCGTGGGCTCGGAGATGTG | AACCCGGA |
| olk146                | CAAGCAGAAGACGGCATAACGAGATGCTTCCGCGTCTCGTGGGCTCGGAGATGTG | GCGGAAGC |
| <i>Reconditioning</i> |                                                         |          |
| P1                    | AATGATACGGCGACCACCGA                                    |          |
| P2                    | CAAGCAGAAGACGGCATAACGA                                  |          |
| <i>Sequencing</i>     |                                                         |          |
| olk115                | CCGGGGGCCAAAATCATTAGGGGATTCATCAG                        |          |
